# Supplementary material
Source: PubMed Central journal article supplement (PMC8902551)
Supplement: ajtr0014-0942-f6.pdf [file ajtr0014-0942-f6.pdf]

## TIGIT and exhausted T cells in HBV

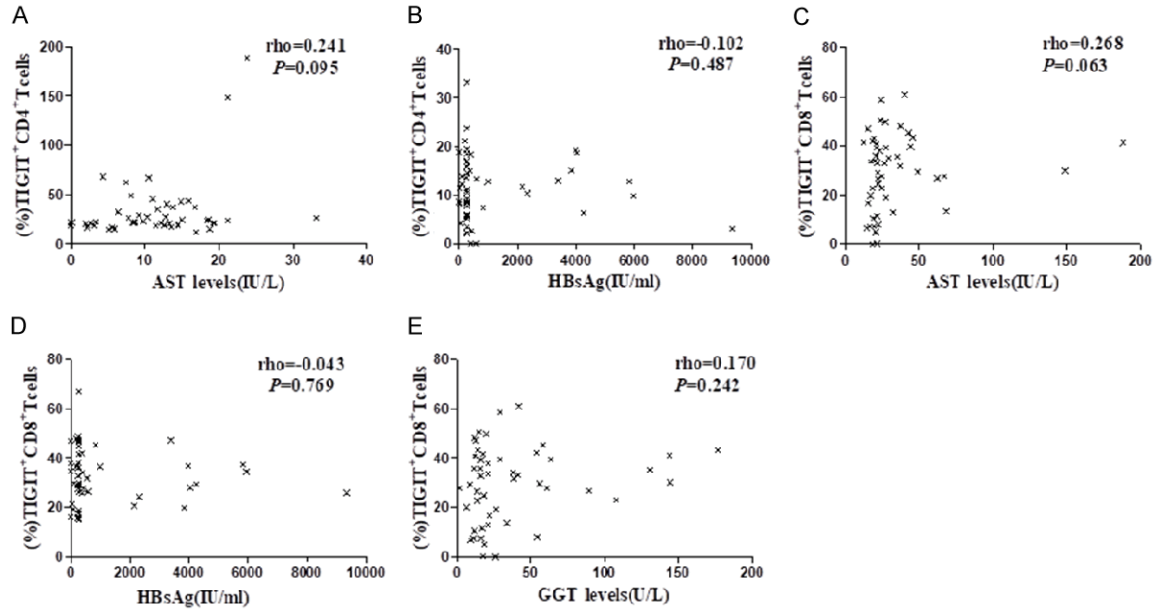

**Supplementary Figure 1.** The relationship between the expression of elevated TIGIT on T cells and clinical parameters in patients with chronic HBV infection. Graphs show correlation between the percentage of TIGIT<sup>+</sup>CD4<sup>+</sup> and (A) AST (IU/L) levels, and (B) HBsAg (IU/mL) levels in chronic HBV infection group (n=50). Graphs show correlation between the percentage of TIGIT<sup>+</sup>CD8<sup>+</sup> and (C) ALT (IU/L) levels, (D) HBsAg (IU/mL) levels, and (E) GGT (U/L) levels in chronic HBV infection group (n=50). Spearman's rho tests were performed for correlations.
